# Supplementary material
Source: publisher figshare collection journal article supplement (https://acs.figshare.com/ndownloader/files/4549222)
Supplement: Supplementary file 1 [file 4549222]

## Supporting Information for

### In Situ Gelation of P(NIPAM-HEMA) Microgel Dispersion and Its Applications as Injectable 3D Cell Scaffold

Tiantian Gan, Yongjun Zhang\*, Ying Guan

Key Laboratory of Functional Polymer Materials, Institute of Polymer Chemistry, College of Chemistry, Nankai University, Tianjin 300071, China

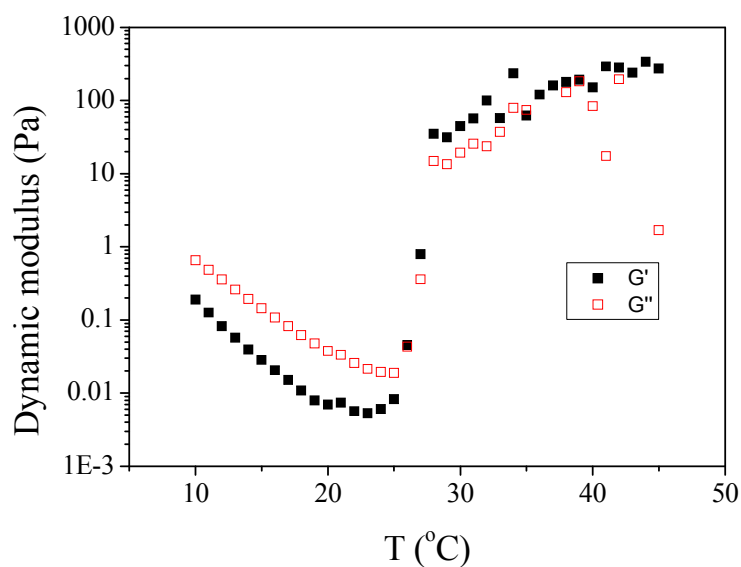

Figure 1. Evolution of dynamic modulus of a 6.0 wt% P(NIPAM-HEMA) microgel dispersion containing 0.154M NaCl with temperature increase at 0.05Pa and 0.1Hz.

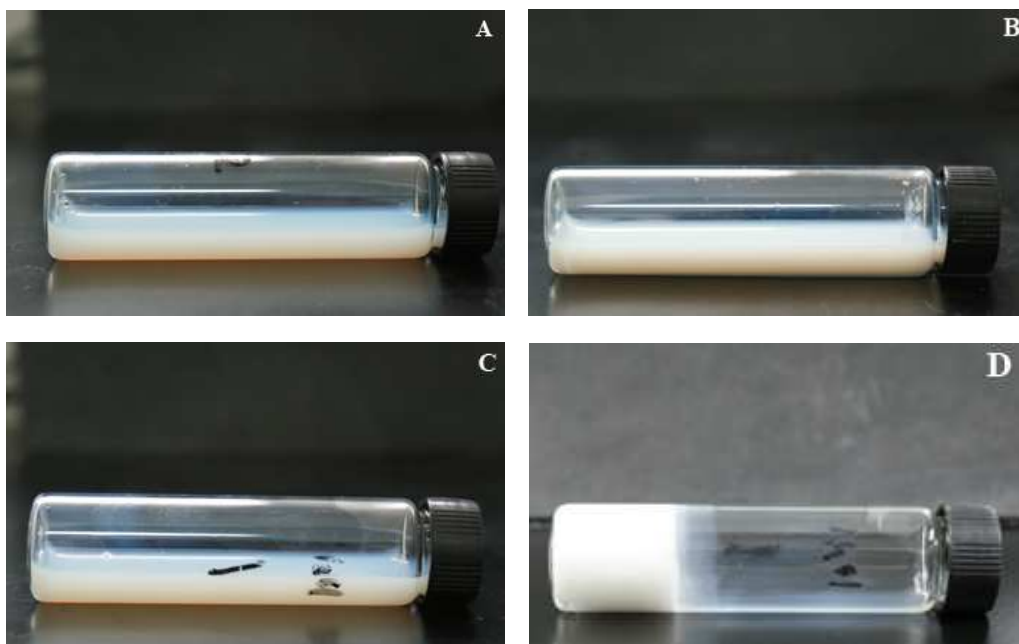

Figure 2. Photographs of 6wt% P(NIPAM-HEMA) microgel dispersion under various conditions. A: [Salt]=0, room temperature; B: [Salt]=0, 37°C; C: [CaCl<sub>2</sub>] = 0.005M, [NaCl] = 0.137M, room temperature; D: [CaCl<sub>2</sub>] = 0.005M, [NaCl] = 0.137M, 37°C.
